# Supplementary material for: Strategic crossing of biomass and harvest index—source and sink—achieves genetic gains in wheat
Source: Springer Nature journal article supplement (doi:10.1007/s10681-017-2040-z), 2017-10-30
Supplement: 10681_2017_2040_MOESM1_ESM.xlsx [file 10681_2017_2040_MOESM1_ESM.xlsx]

## Sheet: Table S1
	Supplemental Table 1 Agronomic traits of 2nd WYCYT at the selection environment Obregon (combined 2015 & 2016 cycles) and across all target environments and within clusters determined by GxE modelling (2014)
	(top 3 values of traits for PT lines shaded in light grey; all traits for all checks shaded in dark grey)
								Obregon										Target
			YLD	BM	HI	KNO	TKW	Spikes	Grains	ANT	MAT	HGT	BM-ANT	All YLD	C1 YLD	C2 YLD	C3 YLD	C4 YLD	C5 YLD	All BM	All DH	All KNO	All HGT	All TKW		CHECK THIS
	Lines in order of mean yield across all sites*	PT or CH	g m-2	g m-2		m-2	g	m-2	/spike	days	days	cm	g m-2	g m-2	g m-2	g m-2	g m-2	g m-2	g m-2	g m-2	days	m-2	cm	g		Ent
	SERI/BAV92//PUB94.15.1.12/WBLL1	PT	771.75	1619.25	0.47175	18014.8	42.425	338.5	53.175	80	120	103.5	1005.25	567.29	485.844	634.67	537.121	588.517	565.628	1372.18	90.6241	14200.1	99.476	40.3581		19
	BCN/WBLL1//PUB94.15.1.12/WBLL1	PT	753.75	1608	0.46925	17223	43.5	326.75	52.6	79.5	121.5	107.5	1028.5	555.098	457.398	602.816	575.308	539.368	610.277	1417.97	90.2498	14311.3	101.164	39.8301		22
	WBLL1//YANGLING SHAANXI/ESDA/3/ROLF07	PT	654.75	1421.75	0.46325	14655.2	44.75	299.5	49.175	76.5	119.75	106.5	963.5	542.703	353.134	611.254	566.867	646.637	650.909	1451.18	87.9776	13313.9	100.853	42		7
	SERI/BAV92//PUB94.15.1.12/WBLL1	PT	586.25	1348	0.455	13630.5	43.2	308	44.55	78.75	120.25	104.75	877.5	541.424	486.449	585.555	489.79	520.262	608.077	1409.15	90.3086	13727.9	101.172	39.7585		17
	BCN/WBLL1//PUB94.15.1.12/WBLL1	PT	713.25	1486.25	0.47975	16781.5	42.35	317.75	53.875	77.5	118.75	99.25	931.75	538.39	446.947	583.996	570.182	565.354	536.941	1395.32	89.7838	14291.7	96.9613	38.8039		20
	QUAIU	ECH	.	.	.	.	.	.	.	.	.	.	.	536.329	417.627	564.931	573.102	521.575	685.62	1420.72	87.4773	13659	101.483	41.7761		41
	C80.1/3*QT4118//KAUZ/RAYON/3/2*TRCH/4/BERKUT/KRICHAUFF	PT	743	1668.75	0.44375	16538.8	44.725	371.5	44.45	75.25	120.25	103	886	535.126	464.575	559.264	538.157	595.084	573.831	1430.29	88.823	13272.3	101.062	41.4417		26
	SOKOLL	ECH	.	.	.	.	.	.	.	.	.	.	.	532.597	475.135	543.483	534.338	593.987	581.632	1353.7	87.482	13580.3	97.2061	39.9661		29
	WBLL1//PUB94.15.1.12/WBLL1	PT	595	1311.75	0.46025	13089.2	45.45	270.25	48.4	80	118.5	103	871.5	531.445	474.561	556.117	506.737	596.522	556.199	1393.99	91.2646	13228.4	101.794	40.6721		16
	C80.1/3*QT4118//KAUZ/RAYON/3/2*TRCH/4/BERKUT/KRICHAUFF	PT	523.75	1200	0.45275	11622	45.025	277	42.075	74.25	116	104	913	524.517	469.583	549.009	484.052	559.404	594.627	1322.57	86.562	12277.8	105.154	43.7473		27
	PASTOR//HXL7573/2*BAU/3/WBLL1	PT	552.75	1261.5	0.4515	13747	40.325	278.5	49.55	76.75	116	102.75	831.75	523.851	440.444	586.206	480.585	576.763	538.774	1271.1	88.5399	13541.1	101.194	39.6806		33
	PASTOR//HXL7573/2*BAU/3/WBLL1	PT	691.25	1441.5	0.48225	17324.8	39.925	345	50.6	75.75	115.5	99.5	873	522.709	447.71	551.614	555.925	532.515	558.339	1316.35	88.9861	14329.1	97.5963	37.7564		30
	WBLL1//YANGLING SHAANXI/ESDA/3/ROLF07	PT	657.25	1357	0.4915	14585.8	45.025	289	50.5	76.25	118.25	101	843.75	522.043	374.127	579.862	546.083	571.393	607.51	1380.62	88.5635	13401.8	100.17	40.2297		9
	HE1/2*CNO79//BAV92/3/ROLF07	PT	656.5	1430.75	0.46775	15309.2	42.75	337.75	45.35	74	116.5	102	891.75	521.894	382.577	550.254	563.251	588.404	639.249	1449.84	86.8271	13879.3	99.622	38.7338		12
	BCN/WBLL1	PT	681	1471.5	0.46375	15625.5	43.575	319.25	49.075	76	115.5	100.5	898	520.942	417.053	540.88	527.913	595.591	624.178	1384.62	88.0446	13426.5	97.408	40.1669		38
	WBLL1//YANGLING SHAANXI/ESDA/3/ROLF07	PT	756	1555.75	0.48225	16254.8	46.25	297.5	54.7	76	118.75	103	862.75	520.49	343.183	612.87	566.64	431.813	646.849	1463.14	87.8489	13440.2	102.002	41.2323		8
	SOKOLL/WBLL1	PT	647.25	1484	0.43275	13112	49.125	281.75	46.65	78.25	118.5	105.25	913	520.33	460.093	544.163	557.698	545.702	521.304	1406.55	89.5836	11812.5	100.929	45.6816		37
	SOKOLL//PUB94.15.1.12/WBLL1	PT	746.5	1745.75	0.42025	14491.5	51.075	327	44.525	78.5	118.25	105.5	883.25	519.149	446.961	538.114	545.078	537.285	579.173	1410.77	90.7201	11244.7	99.9736	48.55		25
	PASTOR//HXL7573/2*BAU/3/WBLL1	PT	665	1294.25	0.51375	15258.8	43.875	285.75	53.275	73.25	114.25	97.75	850	518.258	420.157	528.29	543.615	542.266	652.851	1219.01	86.5799	12256.3	96.0363	45.2314		34
	BCN/WBLL1//PUB94.15.1.12/WBLL1	PT	633.75	1452.75	0.44175	15264.5	41.65	290.5	52.475	79	120	102.75	952	518.16	434.504	556.823	530.323	589.91	514.103	1361.37	91.3531	13899.4	98.5271	37.9543		21
	WBLL1//PUB94.15.1.12/WBLL1	PT	682.5	1456.25	0.47025	14363.8	47.45	267.75	54.15	78	118.75	103.5	874	517.638	394.754	566.682	558.467	510.242	596.289	1441.38	89.9358	13215.9	103.119	41.1188		15
	BCN/WBLL1//ROLF07	PT	573.25	1220.75	0.473	12929.8	44.275	281.25	46.6	76.75	116.75	103.25	919.5	517.273	361.638	601.225	533.984	549.884	565.472	1386.53	88.7261	13230.1	99.082	40.1384		6
	BCN/WBLL1//ROLF07	PT	678	1477.75	0.45475	16157.2	41.775	340	47.5	76.25	117.5	104.5	862.5	515.474	372.95	591.002	503	563.49	586.522	1390.42	88.7044	14010.4	101.641	37.6103		5
	SOKOLL//PUB94.15.1.12/WBLL1	PT	598	1405.25	0.42775	13284.8	45.2	328.5	40.825	75.25	117.25	108.75	980.25	514.337	433.295	541.478	551.703	545.15	538.516	1298.38	88.7596	12115.2	103.576	43.8813		24
	ROELFS F2007	ECH	557.25	1249.75	0.45625	16159.2	34.475	310	53.05	73.75	115.25	89	856	513.887	374.079	564.484	512.632	574.849	622.065	1371.54	88.2255	13066.7	100.264	40.8363		2
	BAV92/ROLF07	PT	715	1441.5	0.4945	15716.8	45.425	315	50.425	76.5	117.5	98.25	871.75	511.452	376.414	565.631	527.976	569.8	589.613	1338.13	87.353	12871	96.7683	40.7251		4
	C80.1/3*QT4118//KAUZ/RAYON/3/2*TRCH/4/BERKUT/KRICHAUFF	PT	697.75	1547	0.45275	15117.5	46	345.5	43.85	75.5	118.5	105	875.5	511.185	395.236	580.203	473.745	513.899	610.749	1333.7	88.398	12783.4	102.653	41.0046		28
	WBLL1//PUB94.15.1.12/WBLL1	PT	665.25	1403	0.47975	14264.5	46.475	276	54.125	77.5	118.25	104	838.5	509.191	425.174	547.544	544.63	532.74	513.658	1340.52	91.1183	12499.5	102.057	42.6528		14
	SOKOLL/4/C80.1/3*QT4118//KAUZ/RAYON/3/2*TRCH	PT	693.5	1532.5	0.45025	16740	41.475	339.5	50.725	73	118.75	107.75	842.25	508.287	402.604	554.407	511.816	591.401	534.964	1317.59	87.1931	13229.1	104.694	39.3652		23
	CMH79A.955/4/AGA/3/4*SN64/CNO67//INIA66/5/NAC/6/RIALTO/7/ROLF07	PT	712.75	1501.25	0.47375	16336.5	43.85	361.75	45.7	77.5	117.75	102.75	951	508.287	355.869	543.102	548.097	636.136	599.242	1361.03	87.568	13924.4	98.9399	38.0679		10
	SERI/BAV92//PUB94.15.1.12/WBLL1	PT	606.25	1341.5	0.4785	15940.2	38.15	324.25	49.1	78	119.5	101.75	926	507.3	394.915	559.15	490.661	615.203	541.85	1337.12	88.8785	14602.3	100.123	35.4954		18
	TACUPETO F2001	ECH	724	1564.25	0.45875	16676.5	43.475	351.25	47	76.5	116.25	102.75	836.5	506.224	323.906	569.215	539.987	559.344	644.399	1336.01	87.2133	12766.5	100.206	41.3265		42
	BAV92/ROLF07	PT	705.25	1448	0.4855	15613	45	320.25	48.35	74.75	116.5	96.75	876.25	503.337	358.811	555.568	512.035	547.956	626.6	1317.59	87.4177	12888.1	96.8412	40.2844		3
	PASTOR//HXL7573/2*BAU/3/WBLL1	PT	715.5	1495.5	0.47825	16379	43.7	318.75	51.45	75	115.25	102.25	895.75	498.202	395.063	498.22	545.419	578.907	611.178	1309.61	86.9294	12539.7	98.118	41.4871		31
	HE1/2*CNO79//BAV92/3/ROLF07	PT	760.5	1593.5	0.4695	16967.2	44.55	327	51.625	74.75	116.25	105.75	802	495.057	351.365	520.333	547.047	575.875	615.283	1318.05	86.8568	12779.1	102.867	39.9941		11
	BCN/WBLL1	PT	621	1340.5	0.47475	15136.8	41	321	47.35	76	117	98	853.25	493.152	353.14	530.458	533.391	607.119	556.693	1322.01	89.6998	13925.8	95.6881	36.2067		13
	PASTOR//HXL7573/2*BAU/3/WBLL1	PT	603.25	1263.75	0.48325	13836.2	43.675	285.5	48.875	74	114	102.5	888.25	490.739	372.229	508.673	547.672	583.62	564.99	1242.68	86.4614	12337.2	98.3217	41.7521		32
	PASTOR//HXL7573/2*BAU/3/WBLL1	PT	577	1294	0.44825	13131.8	43.95	288	45.75	77.75	116.25	101.5	905.5	474.652	378.696	482.248	506.922	606.888	532.037	1261.45	88.9546	11752.5	99.5925	42.616		36
	PASTOR//HXL7573/2*BAU/3/WBLL1	PT	637.5	1328.75	0.4865	14855	43.075	295.75	50.7	74.75	116	99.5	821.75	466.236	356.087	469.698	560.82	544.635	528.532	1206.02	86.7954	12159.4	95.7844	40.6394		35
	WEEBILL1	LCH	607	1284	0.48075	15028.8	40.425	335	45.95	76.25	116.75	97	811.25	461.543	340.854	493.418	518.051	563.326	499.413	1216.57	89.553	11634.4	93.2462	40.3891		1
	WHEAR/KUKUNA/3/C80.1/3*BATAVIA//2*WBLL1	ECH	.	.	.	.	.	.	.	.	.	.	.	459.756	359.603	512.087	492.275	473.898	474.613	1214.18	88.3958	12052.1	98.3444	39.8704		39
	D67.2/PARANA 66.270//AE.SQUARROSA (320)/3/CUNNINGHAM	ECH	.	.	.	.	.	.	.	.	.	.	.	390.907	312.248	413.547	526.218	423.062	360.95	1108.07	93.2424	11973.1	97.2986	34.5573		40
	Mean all genotypes		662.086	1430.19	0.466322	15188.5	43.6421	312.98	48.8974	76.4013	117.539	102.263	888.526	511.592	402.071	551.156	532.841	559.661	575.231	1342.83	88.6662	13082.1	99.7383	40.5617
	Mean all PT lines		664.886	1435.69	0.466414	15122.8	44.0007	311.343	48.9171	76.4786	117.664	102.779	893.15	516.732	408.009	556.582	534.654	565.121	579.932	1356.31	88.0356	13206.8	100.154	40.6529
	Mean all checks		629.417	1366	0.46525	15954.8	39.4583	332.083	48.6667	75.5	116.083	96.25	834.583	485.892	371.212	522.352	514.711	545.076	555.177	1295.85	88.3998	12705.5	98.1187	39.8051
	Mean all PT:mean all checks		1.05635	1.05102	1.0025	0.947852	1.11512	0.937544	1.00515	1.01296	1.01362	1.06783	1.07017	1.06347	1.09913	1.06553	1.03875	1.03678	1.04459	1.04665	0.99588	1.03945	1.02074	1.0213
	P value: mean all PT v mean all checks		0.423	0.32										0.0407	0.1066	0.1639	0.4265	0.5711	0.6401	0.3232	0.8407	0.166	<0.01	0.09934
	P value Top PT line v local check		0.252	0.042										<0.01	<0.01	<0.01	0.0431	0.484	<0.01	<0.01	<0.01	<0.01	<0.01	<0.01
	P value: Top 3 PT lines v Top 3 checks		0.0717	0.017										0.2649	<0.01	0.2961	0.4301	0.4515	0.9808	0.5763	0.9033	0.1502	<0.01	<0.01
	SE mean		67.04	100.23	0.0415503	1396.48	0.906224	31.66	2.50651	2.30113	2.57133	1.38232	77.6778	24.7	39.1	42.4	43.6	71.4	89.4	105	3.06	635.1	1.2	0.87
	Coefficient of variation		0.19	0.13	0.189817	0.175136	0.0388673	0.190061	0.0839438	0.0649925	0.0470992	0.0248062	0.169269	0.4	0.42	0.38	0.25	0.3	0.44	0.42	0.27	0.36	0.092	0.16
	Alpha lattice adjusted means. Abbreviations: yield (YLD), biomass (BM), harvest index (HI), kernel number per m2 (KNO), thousand kernel weight (TKW; g), spike density (Spikes), grains per spike (Grains/spike), days to heading (DH), days to anthesis (ANT), plant height (HGT), and biomass at anthesis (BM-ANT). For all target environments (All) or individual clusters (C#). Physiological Trait select…
