# Supplementary material for: Strategic crossing of biomass and harvest index—source and sink—achieves genetic gains in wheat
Source: Springer Nature journal article supplement (doi:10.1007/s10681-017-2040-z), 2017-10-30
Supplement: 10681_2017_2040_MOESM2_ESM.xlsx [file 10681_2017_2040_MOESM2_ESM.xlsx]

## Sheet: Table S2
	Supplemental Table 2 Agronomic traits of 3rd WYCYT at the selection environment Obregon and across all target environments and within clusters determined by GxE modelling (2016)
	(top 3 values of traits for PT lines shaded in light grey; all traits for all checks shaded in dark grey)
								Obregon										Target
			YLD	BM	HI	KNO	TKW	Spikes	Grains	ANT	MAT	HGT	BM-ANT	All YLD	C1 YLD	C2 YLD	C3 YLD	All BM	All DH	All KNO	All HGT	All TKW
	Lines in order of mean yield across all sites*	PT or CH	g m-2	g m-2		m-2	g	m-2	/spike	days	days	cm	g m-2	g m-2	g m-2	g m-2	g m-2	g m-2	days	m-2	cm	g
	MEX94.27.1.20/3/SOKOLL//ATTILA/3*BCN/4/PUB94.15.1.12/WBLL1	PT	785.696	1641.38	0.48557	14779.9	53.5013	318.543	46.9245	80.5607	123.195	107.5	1153.01	594.156	552.603	558.111	625.898	1247.41	93.9478	11562.5	105.116	43.7522
	BORLAUG100 F2014	ECH	750.287	1382.86	0.54223	16660.8	45.0259	296.656	55.9358	76.4862	120.66	93	953.79	581.779	503.29	575.556	614.836	1049.93	92.1077	11722.3	98.0524	41.9544
	WBLL4//OAX93.24.35/WBLL1/5/CROC_1/AE.SQUARROSA (205)//BORL95/3/PRL/SARA//TSI/VEE#5/4/FRET2	PT	694.233	1526.01	0.44966	16571.7	41.92	373.744	43.5141	79.9606	123.861	99	919.8	579.328	543.682	520.294	628.282	1231.97	93.162	12591.8	99.7753	39.6736
	SOKOLL/3/PASTOR//HXL7573/2*BAU/4/PARUS/PASTOR	PT	696.054	1553.52	0.44247	16004.2	43.4244	362.19	43.1649	81.0212	123.884	105	972.4	578.449	532.965	533.945	620.078	1215.41	93.6963	11934.8	101.129	40.6532
	SERI/BAV92//PUB94.15.1.12/WBLL1	PT	665.866	1456.28	0.4603	15257.2	43.8443	328.353	48.3221	83.4529	125.847	107.5	958.08	573.051	554.354	513.85	606.101	1244.23	95.8399	12150.4	103.8	39.954
	SERI/BAV92//PUB94.15.1.12/WBLL1	PT	763.888	1583.72	0.49158	17347.1	44.2219	358.807	49.7704	83.4856	126.213	104.5	1067.22	572.702	517.432	503.596	630.879	1152.83	95.3676	12297.8	102.321	38.4446
	SOKOLL/3/PASTOR//HXL7573/2*BAU/4/PARUS/PASTOR	PT	679.939	1491.15	0.45181	16431.4	41.1906	363.99	46.1942	82.0138	125.411	103.5	1140.78	571.3	540.076	525.521	608.838	1157.68	94.0057	13292.9	101.94	37.7797
	MEX94.27.1.20/3/SOKOLL//ATTILA/3*BCN/4/PUB94.15.1.12/WBLL1	PT	647.82	1413.88	0.45539	13009.6	49.663	263.336	48.6235	85.0212	127.061	110.5	1042.83	567.452	560.284	477.296	614.86	1146.84	96.3254	10955.2	104.069	43.0893
	MEX94.27.1.20/3/SOKOLL//ATTILA/3*BCN/4/PUB94.15.1.12/WBLL1	PT	679.527	1579.76	0.43238	13393.7	50.6121	306.51	43.9898	82.0343	123.982	107.5	956.43	566.299	548.407	504.759	604.356	1216.01	94.5159	11375.1	102.999	42.6534
	SERI/BAV92//PUB94.15.1.12/WBLL1	PT	777.353	1686.05	0.46298	16689.4	46.7326	338.527	50.4365	81.9659	124.642	108.5	918.65	565.906	540.989	496.752	607.488	1217.81	94.7876	11491.6	104.167	41.6405
	SOKOLL/3/PASTOR//HXL7573/2*BAU/4/PARUS/PASTOR	PT	626.464	1328.62	0.46423	13658.1	45.6122	283.586	47.9836	81.5475	123.159	100.5	936.59	565.896	548.753	500.512	601.703	1209.21	94.4756	11999.8	98.7271	40.9825
	MEX94.27.1.20/3/SOKOLL//ATTILA/3*BCN/4/PUB94.15.1.12/WBLL1	PT	795.346	1873.49	0.4256	15110.2	52.5097	352.267	43.3578	82.4861	122.188	109	1129.41	565.367	541.411	497.375	613.623	1198.3	94.0039	10560.9	104.579	44.5562
	CROC_1/AE.SQUARROSA (224)//OPATA/3/PUB94.15.1.12/WBLL1	PT	660.174	1463.69	0.45449	14122.9	46.7921	336.124	42.2487	84.5127	125.399	106.5	1179.7	559.335	551.391	511.985	583.97	1294.67	96.2053	11627.9	105.596	42.0495
	PAVLOVKA/V15.89C//NAVJ07/3/ROLF07	PT	630.576	1303.65	0.48085	15148.8	41.7077	275.004	53.5782	77.9854	123.71	101.5	929.68	558.26	525.975	516.806	606.222	1210.88	93.4114	12744.7	101.492	38.5297
	SOKOLL/3/PASTOR//HXL7573/2*BAU/4/SOKOLL/WBLL1	PT	757.693	1614.5	0.46981	15868.2	47.7436	335.553	46.643	80.0271	123.852	98.5	1130.8	557.997	556.236	470.397	601.158	1185.59	95.0977	11642.2	99.6257	41.071
	MEX94.27.1.20/3/SOKOLL//ATTILA/3*BCN/4/PUB94.15.1.12/WBLL1	PT	741.784	1583.44	0.46952	14081.8	52.5786	307.009	46.305	83.4938	124.544	109.5	1271.04	557.948	499.885	488.91	627.71	1140.59	95.2138	10505.9	102.917	44.328
	C80.1/3*QT4118//KAUZ/RAYON/3/2*TRCH/4/BERKUT/KRICHAUFF	PT	775.884	1821.3	0.42741	14973.5	51.8835	404.403	37.14	80.4734	123.047	106.5	916.56	556.013	569.216	495.25	568.537	1160.86	94.749	10844.9	104.753	42.9185
	WBLL1//PUB94.15.1.12/WBLL1	PT	654.755	1425.47	0.45657	14061	46.5576	290.266	48.0432	80.4865	124.283	107	958.6	552.738	534.423	506.18	584.95	1189.64	93.6989	11602.3	105.899	41.2525
	MEX94.27.1.20/3/SOKOLL//ATTILA/3*BCN/4/PUB94.15.1.12/WBLL1	PT	697.963	1476.67	0.47145	14143	49.2862	258.73	54.6377	88.0072	125.815	114	1304.99	552.668	528.454	479.62	593.502	1261.21	96.7788	10693.1	105.219	43.7864
	SERI/BAV92//PUB94.15.1.12/WBLL1	PT	719.688	1512.03	0.47895	17750.1	40.5272	354.228	51.309	82.9734	124.741	107	1173.42	551.262	531.586	486.376	599.359	1178.44	94.5465	12712.9	102.331	37.3369
	SOKOLL	ECH	607.527	1324.09	0.44898	12337.3	48.8763	266.799	46.3338	83.5069	125.09	108	1061.63	549.223	524.563	521.924	576.654	1160.35	95.6607	10683.5	104.582	43.481
	MEX94.27.1.20/3/SOKOLL//ATTILA/3*BCN/4/PUB94.15.1.12/WBLL1	PT	635.205	1443.99	0.44081	13067.4	48.4698	239.231	54.3724	85.0477	125.253	114	1086.26	549.121	538.426	502.157	582.289	1247.87	95.7454	11171.7	106.193	41.8572
	SOKOLL//PUB94.15.1.12/WBLL1	PT	653.176	1553.85	0.42296	12800.2	50.9025	287.124	45.5776	83.973	126.93	116.5	993.22	548.379	521.711	488.695	589.09	1234.54	96.1092	10358.3	105.144	44.1861
	MEX94.27.1.20/3/SOKOLL//ATTILA/3*BCN/4/PUB94.15.1.12/WBLL1	PT	682.291	1533.46	0.44889	13712.7	50.0598	289.89	47.5431	86.5201	127.472	111.5	1127.02	546.369	528.207	463.053	594.998	1135.23	96.0462	10874.6	104.43	43.3816
	WBLL1//PUB94.15.1.12/WBLL1	PT	688.501	1405.63	0.48356	14358.1	47.8046	273.702	53.6944	83.9732	124.842	109.5	981.32	545.868	519.605	506.296	578.705	1200.34	95.6498	11427.5	105.872	39.8919
	SERI/BAV92//PUB94.15.1.12/WBLL1	PT	691.44	1529.9	0.45216	16286.8	42.5191	335.918	49.0303	85.4737	126.282	104.5	1253.66	544.418	537.809	499.157	565.848	1134.13	95.8735	12151.1	101.038	37.965
	SUP152//PUB94.15.1.12/WBLL1	PT	554.226	1251.45	0.45251	13366.7	41.5568	288.588	46.9511	81.5465	125.953	103	1055.72	538.592	502.043	527.86	560.572	1146.53	94.9432	11193.5	105.907	40.5575
	SOKOLL//PUB94.15.1.12/WBLL1	PT	608.498	1378.1	0.43981	11618.3	52.2207	270.557	41.4562	84.5345	125.832	112	1144.02	537.166	540.248	478.024	569.857	1215.46	96.0622	10453.1	105.468	44.4364
	MEX94.27.1.20/3/SOKOLL//ATTILA/3*BCN/4/PUB94.15.1.12/WBLL1	PT	832.825	1807.56	0.45747	16858.3	49.2593	346.579	48.7608	83.5069	122.613	107	1147.16	536.044	531.756	474.281	578.322	1136.32	95.6966	10654.9	106.041	43.8998
	SUP152//PUB94.15.1.12/WBLL1	PT	486.704	1091.52	0.45023	12144.3	40.0292	263.135	48.0028	83.0138	126.588	108.5	1033.96	534.566	522.86	511.629	548.836	1193.65	94.9875	11537.6	104.791	39.0068
	BAJ #1	ECH	585.879	1205.52	0.48234	14376.7	40.837	344.856	41.8736	72.9533	113.821	100.5	1091.05	529.746	530.771	522.774	517.368	1094.53	88.8701	11586.3	98.2071	39.1535
	SOKOLL/WBLL1	PT	691.993	1441.99	0.4794	14114.7	49.1767	300.61	47.0661	84.0201	125.449	104	935.5	527.869	511.67	477.455	561.989	1195.32	96.0856	10729	101.581	44.2882
	SERI/BAV92//PUB94.15.1.12/WBLL1	PT	654.743	1449.66	0.4471	13849.1	47.2038	371.54	36.883	85.5072	128.048	103.5	1001.11	527.722	497.276	494.778	544.912	1089.36	95.8297	11031.5	99.9834	40.2859
	C80.1/3*QT4118//KAUZ/RAYON/3/2*TRCH/4/BERKUT/KRICHAUFF	PT	696.651	1479.89	0.47618	15102	46.158	326.793	46.8895	82.4928	122.972	105	1082.52	525.287	513.503	480.239	554.283	1105.69	94.5288	11065.1	102.021	40.1464
	WBLL1/6/CMH79A.955/4/AGA/3/4*SN64/CNO67//INIA66/5/NAC	PT	683.412	1473.68	0.46885	15248.8	44.9164	334.638	46.8585	83.4658	126.171	109	1036.28	523.714	470.014	480.53	565.052	1149.49	96.8568	11579.3	106.144	39.4989
	KACHU #1	ECH	699.622	1495.34	0.4682	17130	40.7705	366.857	47.0083	79.4938	123.759	94.5	1056.83	523.377	436.722	510.296	568.05	1068.01	93.1344	11960.4	94.9986	36.938
	SOKOLL//PUB94.15.1.12/WBLL1	PT	607.628	1500.29	0.40544	12723.3	47.72	329.34	43.4124	84.9998	126.075	113.5	1303.87	522.603	551.641	439.962	543.466	1194.06	96.1479	10526.8	109.168	42.5572
	LOCAL CHECK	LCH	688.343	1427.73	0.48267	16357.4	42.1224	326.894	48.9126	80.4857	122.356	104	830.52	522.138	476.583	505.271	541.501	1130.17	93.0373	11911.8	96.6731	39.4763
	CROC_1/AE.SQUARROSA (224)//OPATA/3/PUB94.15.1.12/WBLL1	PT	667.615	1408.06	0.47512	14134.5	47.2583	226.514	61.3768	81.5128	126.37	105.5	963.3	521.425	480.058	508.139	541.366	1267.4	95.4093	10876.5	103.055	42.8553
	SUP152//PUB94.15.1.12/WBLL1	PT	518.637	1294.09	0.40416	11924.8	43.4899	297.92	39.4343	85.0404	128.3	107	1140.95	512.525	489.827	474.29	550.158	1216.39	96.7883	11662.3	106.576	38.3784
	BCN/WBLL1//PUB94.15.1.12/WBLL1	PT	718.155	1563.42	0.45682	17427.9	41.1521	312.936	56.5806	84.4938	126.855	107.5	1296.09	463.981	478.779	420.254	487.657	1232.82	96.2092	11295.7	101.922	37.1554
	ROELFS F2007	ECH	563.635	1295.78	0.43472	16714.1	33.6914	377.115	44.9502	79.9854	124.739	89	967.8	431.905	459.702	380.043	439.611	1058.32	94.6349	11713.5	94.9077	32.4185
	Mean all genotypes		676.612	1477.92	0.458372	14778.9	45.9888	316.318	47.4069	82.4653	124.697	105.81	1061.99	544.999	522.504	495.957	578.641	1178.94	94.9106	11446.5	102.838	40.91
	Mean all PT lines		681.178	1498.37	0.455347	14642.8	46.6724	314.061	47.391	83.0731	125.19	107.083	1073.39	548.66	517.578	493.154	580.834	1192.3	95.3232	11384.4	103.471	41.5404
	Mean all checks		649.215	1355.22	0.476523	15596.1	41.8873	329.863	47.5024	78.8186	121.737	98.1667	993.603	523.028	480.546	501.516	539.668	1093.8	93.0539	11609	97.7896	39.1435
	Mean all PT:mean all checks		1.04923	1.10563	0.955561	0.938875	1.11424	0.952095	0.997655	1.05398	1.02836	1.09083	1.0803	1.04901	1.07706	0.983327	1.07628	1.09005	1.02439	0.98066	1.0581	1.06123
	P value: mean all PT v mean all checks		0.232	<0.01										0.07496	0.2313	0.8001	0.005142	0.02234	0.1632	0.5324	<0.01	<0.01
	P value Top PT line v local check		0.233	0.056										<0.01	<0.01	0.0917	<0.01	0.0792	0.0192	0.0204	<0.01	<0.01
	P value: Top 3 PT lines v Top 3 checks		0.017	<0.01										0.2646	0.5027	0.3639	0.3267	0.08972	0.4423	0.1732	<0.01	0.03833
	SE mean		37.29	73.51	0.0145283	802.658	0.746996	27.7612	3.65511	0.91632	1.41612	2.15473	82.4162	23.857	52.9	53.4	24.1597	79.7902	2.75568	580.944	1.1841	1.19265
	Coefficient of variation		0.07	0.06	0.0366826	0.0656876	0.0188885	0.0951974	0.0754751	0.0125084	0.0124086	0.021845	0.0929183	0.371784	0.42	0.51	0.234523	0.285233	0.242525	0.312032	0.0967625	0.179917
	Alpha lattice adjusted means. Abbreviations: yield (YLD), biomass (BM), harvest index (HI), kernel number per m2 (KNO), thousand kernel weight (TKW; g), spike density (Spikes), grains per spike (Grains/spike), days to heading (DH), days to anthesis (ANT), plant height (HGT), and biomass at anthesis (BM-ANT). For all target environments (All) or individual clusters (C#). Physiological Trait select…
