# Supplementary material for: Strategic crossing of biomass and harvest index—source and sink—achieves genetic gains in wheat
Source: Springer Nature journal article supplement (doi:10.1007/s10681-017-2040-z), 2017-10-30
Supplement: 10681_2017_2040_MOESM3_ESM.xlsx [file 10681_2017_2040_MOESM3_ESM.xlsx]

## Sheet: Table S3
	Supplemental Table 3 Agronomic traits of 2nd SATYN at the selection environment Obregon and across all target environments and within clusters determined by GxE modelling (2016)
	(top 3 values of traits for PT lines shaded in light grey; all traits for all checks shaded in dark grey)
							Obregon										Target
			YLD	BM	HI	KNO	TKW	Spikes	Grains	ANT	MAT	HGT	All YLD	C1 YLD	C2 YLD	C3 YLD	All BM	ALL DH	All KNO	All HGT	All TGW
	Lines in order of mean yield across all sites*	PT or CH	g m-2	g m-2		m-2	g	m-2	/spike	days	days	cm	g m-2	g m-2	g m-2	g m-2	g m-2	days	m-2	cm	g
	WBLL4//OAX93.24.35/WBLL1	PT	270.5	602	0.449801	6876.94	39.0715	.	.	52.9889	78.7588	69.0138	448.877	341.665	519.605	406.865	1104.36	78.1743	9653.58	96.7121	44.2948
	SOKOLL/WBLL1	PT	266.25	615.75	0.425006	6826.22	38.5732	.	.	53.4935	80.7538	70.7562	441.314	355.347	489.556	442.887	1148.21	78.4753	9886.11	94.7149	43.2443
	PFAU/MILAN/5/CHEN/AEGILOPS SQUARROSA (TAUS)//BCN/3/VEE#7/BOW/4/PASTOR	ECH	259	597	0.434727	7404.8	34.7919	.	.	52.4974	77.492	66.5198	440.788	329.108	508.08	418.427	1103.87	75.194	10640.1	94.3257	39.6518
	SOKOLL*2/TROST	ECH	282.25	635.25	0.439839	9247.06	30.5283	.	.	52.2346	78.9998	68.7489	440.319	353.287	481.409	465.73	1066.23	77.1185	10701.3	91.0874	38.4946
	PUB94.15.1.12/WBLL1	PT	256.25	640.75	0.40223	7112.57	35.5362	.	.	52.9998	79.5015	71.4917	439.333	333.778	494.777	455.256	1194.59	78.245	10281.1	96.0525	41.3163
	SOKOLL/WBLL1	PT	251.25	572.25	0.432513	6737.83	37.0752	.	.	53.2572	79.99	67.0332	431.624	328.136	491.507	423.929	1096.13	78.8753	9825.22	95.5203	41.487
	SOKOLL/WBLL1	PT	274.75	659	0.412161	7652.87	35.5444	.	.	53.9984	80.5083	70.7564	430.433	312.419	493.251	431.981	1157.07	79.1641	9274.4	99.2375	43.0228
	SOKOLL/WBLL1	PT	245.5	575.75	0.422347	6650.55	36.3097	.	.	53.2592	80.7519	67.9942	429.507	339.738	477.089	434.398	1066.19	78.5612	9514.46	95.7712	41.245
	SOKOLL/ROLF07	ECH	275.25	602.25	0.462035	7787.45	34.9926	.	.	48.5017	77.008	71.5007	428.999	340.658	479.32	433.139	1056.86	74.252	9979.5	95.7196	40.1174
	SOKOLL/WBLL1	PT	254.5	594.5	0.429812	7950.9	31.8092	.	.	52.7519	80.2562	68.2473	426.632	334.842	475.018	432.143	1095.74	79.0398	10065.5	92.5854	40.0267
	MTRWA92.161/PRINIA/5/SERI*3//RL6010/4*YR/3/PASTOR/4/BAV92	ECH	285.5	700.75	0.409747	8802.97	32.1167	.	.	52.2446	78.9924	68.277	426.188	298.946	494.555	435.056	1065.92	77.6047	10514.8	92.5055	37.7742
	WHEAR//2*PRL/2*PASTOR	ECH	298.75	631.25	0.474896	8252.36	35.8945	.	.	52.0052	79.0075	68.2599	425.933	318.723	485.337	423.94	1007.39	76.0842	10065.6	95.7434	39.6838
	MEX94.27.1.20/3/SOKOLL//ATTILA/3*BCN	PT	287.75	652.5	0.442418	7919.44	36.341	.	.	52.007	78.2573	67.0267	425.719	306.856	494.225	417.54	1120.69	76.775	9346.66	92.9139	43.7184
	VEE/MJI//2*TUI/3/PASTOR/4/BERKUT	ECH	261.25	588.25	0.442345	8029.24	32.2991	.	.	54.2505	79.2696	64.4849	423.586	332.172	486.912	382.763	1032.51	77.6569	10406.6	93.7997	38.4598
	SW94.2690/SUNCO	ECH	259	630.75	0.409915	7681.69	33.4791	.	.	55.2478	81.0031	68.9959	421.577	310.32	477.429	450.905	1087.96	78.8171	10348.5	94.1862	37.8661
	SOKOLL/WBLL1	PT	277.75	639	0.437095	7697.95	35.8592	.	.	53.5066	79.7467	69.4901	420.726	317.248	471.966	432.621	1060.09	78.6457	9298.95	96.3164	41.2856
	VOROBEY	ECH	263.5	633	0.414682	7783.07	33.7579	.	.	52.0047	79.7491	73.2547	418.279	303.175	484.31	415.644	1149.76	76.694	9655.28	95.7837	40.3535
	SOKOLL//W15.92/WBLL1	PT	234	526.75	0.439632	7169.18	33.4071	.	.	49.7528	77.2432	70.0357	417.351	295.931	494.928	371.632	1058.32	74.9728	10276.8	94.1672	38.4652
	MEX94.27.1.20/3/SOKOLL//ATTILA/3*BCN	PT	267	602	0.447291	6834.22	38.8126	.	.	52.2425	78.7633	68.9947	416.64	316.158	478.874	381.974	1054.41	77.5674	8860.55	96.0246	44.2862
	PUB94.15.1.12/FRTL	PT	238.25	653.25	0.36492	6449.76	36.5565	.	.	55.2472	81.5048	72.0062	414.389	272.365	483.241	441.355	1161.36	79.5015	9020.96	96.1072	41.512
	CNO79//PF70354/MUS/3/PASTOR/4/BAV92/5/FRET2/KUKUNA//FRET2/6/MILAN/KAUZ//PRINIA/3/BAV92	ECH	277.5	623.25	0.439661	7865.72	34.9773	.	.	54.2512	81.7449	69.7146	410.005	322.969	465.39	382.569	1073.8	78.5647	9891.07	93.8333	39.868
	WHEAR/KUKUNA/3/C80.1/3*BATAVIA//2*WBLL1	ECH	259.25	671	0.384866	7312.92	35.2112	.	.	52.9986	79.5121	63.7463	405.105	316.325	439.892	447.853	996.699	77.1973	10142.6	93.327	36.4965
	SOKOLL/WBLL1	PT	272	617.75	0.442271	7871.71	34.0084	.	.	52.245	78.9906	68.7583	404.462	315.659	443.793	434.424	1003.27	75.3591	9584.3	94.9873	39.756
	CNO79//PF70354/MUS/3/PASTOR/4/BAV92/5/FRET2/KUKUNA//FRET2/6/MILAN/KAUZ//PRINIA/3/BAV92	ECH	227.5	560.5	0.397213	5833.13	37.997	.	.	50.0188	78.2608	67.753	399.946	356.538	450.016	296.754	992.147	74.4875	9160.35	92.967	42.3669
	PASTOR//HXL7573/2*BAU/3/MEX94.2.19//ATTILA/3*BCN	PT	226.25	552.25	0.409782	5930.81	37.8223	.	.	52.9891	80.2464	72.5094	398.595	326.39	421.571	454.605	1041.41	77.3313	9326.69	95.6886	38.6899
	SLVS//ATTILA*2/M10 (MUTATED C-306)	ECH	246.5	563.5	0.444798	7955.66	30.5244	.	.	52.5088	78.9891	68.0034	394.794	315.656	445.907	363.961	1117.01	78.6039	10266.4	92.3152	37.0576
	W15.92/WBLL1	PT	246	520	0.484944	7835.58	31.4391	.	.	53.5075	79.7443	67.7428	389.087	313.797	409.976	455.593	994.433	79.2714	9823.15	93.1499	36.3654
	FRET2*2/3/SNI/TRAP#1//KAUZ*3/TRAP/4/ONIX	ECH	233.5	530.75	0.445029	6501.82	35.5461	.	.	49.7474	78.2498	65.9691	387.815	340.373	436.895	299.002	978.167	74.4181	9806.98	93.6008	38.6732
	BABAX/LR42//BABAX/3/BABAX/LR42//BABAX/4/T.DICOCCON PI94625/AE.SQUARROSA (372)//3*PASTOR/5/T.DICOCCON PI94625/AE.SQUARROSA (372)//3*PASTOR	ECH	272.75	669	0.42006	10562.8	25.7034	.	.	53.5043	81.2362	68.9653	387.337	292.895	423.944	448.427	986.505	80.4789	10712.1	93.7868	32.6568
	WEEBILL1	ECH	236	478.5	0.495095	7499.8	31.3481	.	.	52.9988	77.7603	66.2381	382.574	314.9	403.885	453.403	958.567	77.1546	9454.89	92.1261	36.4644
	PASTOR//HXL7573/2*BAU/3/WBLL1	PT	241.75	512	0.469608	7587.6	32.2133	.	.	52.7432	76.7607	69.2416	381.531	305.568	445.047	294.795	1032.43	76.027	9456.24	94.0449	40.0552
	D67.2/PARANA 66.270//AE.SQUARROSA (320)/3/CUNNINGHAM/4/CROC_1/AE.SQUARROSA (205)//KAUZ/3/SASIA	ECH	247.25	514	0.482129	8417.27	29.424	.	.	52.7572	81.2464	63.9741	380.846	342.412	408.794	363.211	963.236	76.6895	10441.8	90.309	34.5445
	FRTL//ATTILA/3*BCN	PT	259.5	556.5	0.46751	8516.56	30.391	.	.	51.9964	79.759	64.0063	379.781	334.033	412.565	350.719	955.805	76.3398	10356.6	85.1364	34.8442
	PUB94.15.1.12/FRTL	PT	222.5	581.5	0.379805	6219.59	35.45	.	.	54	80.7376	72.494	378.527	282.74	421.311	408.323	1104.53	79.4639	8516.47	95.9919	41.4065
	CROC_1/AE.SQUARROSA (224)//OPATA/3/SOKOLL	PT	226.75	503	0.454639	7651.63	30.5925	.	.	48.7441	76.007	61.5146	376.347	292.52	433.961	328.645	1023.06	72.8446	10456.7	88.4124	36.3646
	OPATA//SORA/AE.SQUARROSA (323)	ECH	266.25	640.5	0.424762	8018.78	33.1557	.	.	51.7465	76.7542	77.2461	375.615	318.031	415.767	349.234	1089.81	74.3802	9357.3	102.029	37.9672
	TACUPETO F2001	LCH	255	638.25	0.404811	7145.46	35.4139	.	.	52.5035	78.012	71.7552	370.867	326.917	376.934	439.165	888.984	76.0115	9346.34	95.5172	36.932
	PUB94.15.1.12/3/FRTL//ATTILA/3*BCN	PT	223	492.5	0.454791	7354.6	30.298	.	.	53.009	82.0035	71.7644	366.264	312.339	390.17	390.879	937.371	78.2037	9555.95	94.9963	35.8925
	CROC_1/AE.SQUARROSA (205)//KAUZ/3/SASIA	ECH	195.75	472.25	0.409722	6784.25	28.9148	.	.	56.2587	82.506	55.9921	355.494	286.833	399.109	334.796	898.499	79.4073	9946.12	86.0713	33.8838
	MEX94.2.19/PUB94.15.1.12	PT	224.75	569.5	0.392295	7071.92	32.0638	.	.	54.506	82.496	66.7538	338.726	272.799	359.211	390.987	971.631	78.3009	8365.83	95.2236	38.0495
	MEX94.21.27	ECH	235	549.5	0.424532	6635.46	35.432	.	.	46.7487	77.0089	79.9742	337.189	315.203	340.775	367.431	934.028	72.3202	7888.2	104.562	39.5012
	MEX94.2.19	ECH	262	648	0.415001	8657.19	30.5266	.	.	48.2555	78.4887	63.7352	333.279	319.959	329.457	374.36	951.713	72.2963	10622.6	89.3996	29.9501
	MEX94.15.34	ECH	228.75	559	0.411955	6744.42	33.9403	.	.	52.7556	77.5048	86.2423	325.685	334.908	317.32	339.225	993.365	74.3337	8303.65	111.588	37.8771
	HGO94.9.1.54	ECH	167.75	426	0.394843	5195.53	32.5069	.	.	49.7575	78.249	80.9735	310.728	325.439	296.464	336.158	936.107	75.6592	7533.1	103.756	38.7901
	PBL94.14.30	ECH	223.5	506	0.439969	6551.6	34.1224	.	.	47.5026	77.2616	76.5203	301.637	320.953	296.935	283.291	892.923	70.8165	7793.36	107.377	37.3271
	HGO94.9.1.37	ECH	236.25	576.75	0.419831	7045.92	32.9331	.	.	56.2525	85.9946	88.2475	300.256	236.133	312.903	387.446	1030.4	81.7226	6897.12	111.132	37.7214
	OAX93.10.1	ECH	209.5	503	0.417262	6194.71	33.9354	.	.	47.5054	76.9896	86.9826	299.769	270.95	280.928	426.068	950.114	72.1808	7290.01	110.812	38.3255
	PUB94.15.1.12	ECH	237.75	605.75	0.397219	7164.09	32.3548	.	.	56.4981	86.4963	88.0199	292.71	228.775	300.817	387.164	1036.93	81.5806	7590.39	111.09	35.2666
	COAH90.25.22	ECH	259.75	671.5	0.382519	7564.95	33.8463	.	.	54.5023	86.2493	88.0035	283.606	198.271	294.8	409.175	1054.94	81.6586	6427.42	113.64	38.1032
	MEX94.27.1.20	ECH	242	645.5	0.375089	6867.6	34.7538	.	.	56.0008	85.998	86.4777	282.333	207.292	280.106	437.38	940.19	81.2888	6869.2	109.919	36.3539
	Mean all genotypes		249.405	586.19	0.427508	7388.52	33.792	.	.	52.4661	79.7763	71.2442	385.982	309.769	424.321	398.665	1032.31	77.1162	9375.98	96.7213	38.6771
	Mean all PT lines		250.774	582.786	0.43147	7234.21	34.7226	.	.	52.8212	79.6562	68.9348	407.422	338.849	457.347	410.848	1066.17	78.4266	9651.21	94.528	40.7014
	Mean all checks		248.414	588.655	0.42464	7500.27	33.1182	.	.	52.209	79.8632	72.9164	370.457	302.469	400.573	389.734	1008.54	77.426	9398.74	98.391	37.8531
	Mean all PT:mean all checks		1.0095	0.990029	1.01608	0.964527	1.04844	.	.	1.01173	0.997408	0.945395	1.09978	1.12028	1.14	1.05	1.05715	1.01292	1.02686	0.960738	1.07525
	P value: mean all PT v mean all checks		0.8666	0.8578				.	.				<0.01	<0.01	<0.01	0.4658	0.1493	0.4206	0.2845	<0.01	<0.01
	P value Top PT line v local check		<0.01	<0.01				.	.				<0.01	0.553	<0.01	0.845	<0.01	<0.01	0.0748	0.0482	<0.01
	P value: Top 3 PT lines v Top 3 checks		0.8433	0.8156				.	.				0.8222	0.9624	0.8397	0.9687	0.7014	0.5367	0.4208	<0.01	0.02858
	SE mean		38.28	91.19	0.012663	1604.22	2.48583	.	.	1.24505	2.50468	5.30719	24.7653	47.3113	27.1346	76.1792	100.05	3.06463	603.052	2.38253	1.30678
	Coefficient of variation		0.29	0.29	0.0588571	0.476668	0.171459	.	.	0.042972	0.0611793	0.163022	0.411718	0.531599	0.305445	0.468667	0.453838	0.24839	0.369004	0.155073	0.190796
	Alpha lattice adjusted means. Abbreviations: yield (YLD), biomass (BM), harvest index (HI), kernel number per m2 (KNO), thousand kernel weight (TKW; g), spike density (Spikes), grains per spike (Grains/spike), days to heading (DH), days to anthesis (ANT), and plant height (HGT). For all target environments (All) or individual clusters (C#). Physiological Trait selected lines (PT) or checks: local…
