# Supplementary material for: Strategic crossing of biomass and harvest index—source and sink—achieves genetic gains in wheat
Source: Springer Nature journal article supplement (doi:10.1007/s10681-017-2040-z), 2017-10-30
Supplement: 10681_2017_2040_MOESM4_ESM.xlsx [file 10681_2017_2040_MOESM4_ESM.xlsx]

## Sheet: Table S4
	Supplemental Table 4 Agronomic traits of 4th SATYN at the selection environment Obregon and across all target environments and within clusters determined by GxE modelling (2016)
	(top 3 values of traits for PT lines shaded in light grey; all traits for all checks shaded in dark grey)
								Obregon									Target
			YLD	BM	HI	KNO	TKW	Spikes	Grains	ANT	MAT	HGT	All YLD	C1 YLD	C2 YLD	C3 YLD	C4 YLD	All BM	All DH	All GNO	All HGT	All TGW		CHECK THIS
	Lines in order of mean yield across all sites*	PT or CH	g m-2	g m-2		m-2	g	m-2	/spike	days	days	cm	g m-2	g m-2	g m-2	g m-2	g m-2	g m-2	days	g m-2	cm	g		entry
	JNRB.5/PIFED/5/BJY/COC//PRL/BOW/3/SARA/THB//VEE/4/PIFED	PT	327.5	780.5	0.41775	13028.5	25.425	326	40.375	54.75	80	57.15	438.002	387.417	335.529	506.764	554.912	1097.2	83.4917	11739.3	97.03	35.9033		9405
	SOKOLL	ECH	432.75	1080.5	0.3935	15898.8	27.3	550.25	30.15	54	78.75	57.525	436.496	555.404	309.639	486.003	518.712	1139.67	83.2876	10921.9	95.7145	38.6142		9426
	SOKOLL/WBLL1	PT	445.75	1042.25	0.42725	14427.8	31.525	432.25	34.75	54.25	82.25	64.1	431.184	572.282	304.104	481.814	498.035	1130.29	84.5729	10238.6	96.189	41.0431		9423
	JNRB.5/PIFED/5/BJY/COC//PRL/BOW/3/SARA/THB//VEE/4/PIFED	PT	372.25	868.25	0.42525	12486.8	29.9	336	37.225	55	82	59.1	430.489	415.751	330.867	493.364	538.493	1090.42	83.3645	11096.6	98.9072	38.2764		9404
	KS940935.7.1.2/2*PASTOR/4/FRAME//MILAN/KAUZ/3/PASTOR	PT	282	631.25	0.444	10147.2	27.9	344.75	31.35	46.25	74	50.9	428.717	568.567	315.778	446.543	521.08	1134.94	82.8929	11572.4	95.0648	37.4599		9402
	WORRAKATTA/2*PASTOR/6/CHIR3/4/SIREN//ALTAR 84/AE.SQUARROSA (205)/3/3*BUC/5/PFAU/WEAVER	PT	353	853.25	0.41125	13244.5	26.95	387.75	35.725	55.25	78.25	65.15	424.665	506.163	318.545	456.087	500.885	1167.2	85.9658	10654	103.389	38.5137		9409
	SOKOLL/WBLL1	PT	360.5	940.25	0.37625	13820.2	27.825	376.25	35.125	57.75	82	63.275	422.147	550.908	248.824	511.023	544.361	1135.97	87.54	10367.6	102.08	38.2909		9425
	JNRB.5/PIFED/5/BJY/COC//PRL/BOW/3/SARA/THB//VEE/4/PIFED	PT	244.75	602.75	0.40775	8938	27.4	229.25	39.7	53.75	82	58.475	421.91	395.886	326.424	474.807	536.293	1042.05	82.1028	10422.9	101.75	39.0521		9407
	PASTOR//HXL7573/2*BAU/3/WBLL1	PT	410	903.5	0.44775	12701.8	32.275	324.25	40.325	47	76	58.4	417.685	469.259	344.361	483.809	391.686	1027.79	81.6465	10068.4	95.6835	41.4948		9419
	SOKOLL/WBLL1	PT	409.75	994	0.407	13412.8	30.775	368.75	37.9	54	79.75	67.325	414.02	456.324	307.953	475.273	467.861	1121.29	85.3177	10137.8	95.9855	39.5709		9422
	ROELFS F2007	LCH	254.5	657.75	0.38525	10042	25.75	295.5	33.95	55	80	59.325	413.01	523.654	261.992	490.653	497.784	1065.52	83.5601	10539.5	96.8673	37.257		9428
	WEEBILL1	ECH	269	631.25	0.41975	10416.2	26.775	303.25	32.775	53.5	79.5	51.75	411.188	482.103	295.461	475.518	498.43	1040.8	83.1703	11503.3	92.9616	35.1133		9427
	PASTOR//HXL7573/2*BAU/3/WBLL1	PT	361.5	905	0.3825	12104	30.525	398.25	29.375	54	80	55.75	409.244	526.999	255.658	501.119	475.915	1089.19	83.9864	10837.1	91.9325	36.4375		9421
	WORRAKATTA/2*PASTOR/6/CHIR3/4/SIREN//ALTAR 84/AE.SQUARROSA (205)/3/3*BUC/5/PFAU/WEAVER	PT	406	979.5	0.41	13783.2	29.225	407.5	35.65	52.5	82.5	58.225	406.321	525.782	295.854	449.887	470.458	1097.48	83.2809	10760.6	99.1402	36.627		9410
	PASTOR//HXL7573/2*BAU/3/WBLL1	PT	455.5	996.75	0.44575	15219.5	29.7	399.5	39.075	50.5	78.5	61.575	406.164	501.755	315.643	442.861	430.055	1003.71	83.0928	10990.1	91.813	37.7178		9420
	JNRB.5/PIFED/5/BJY/COC//PRL/BOW/3/SARA/THB//VEE/4/PIFED	PT	307	620.667	0.447333	12117	25.525	235	46.2667	49.25	79.25	50.325	406.118	320.878	300.052	496.745	513.181	1027.3	83.4447	11451.8	90.3905	33.4547		9408
	SOKOLL/WBLL1	PT	356.5	868.25	0.406	14103.8	25.85	411	33.875	55.5	80.25	50.7	405.855	469.802	303.64	443.919	477.19	1027.63	85.1156	11103.1	92.7939	36.4238		9424
	SOKOLL/WESTONIA	PT	319	788.5	0.40375	12027.8	27.05	360.25	33.225	51	79.5	58.2	403.846	602.984	266.096	447.675	441.144	1084.72	81.3208	10492	96.8317	36.9745		9412
	SOKOLL/WESTONIA	PT	271.5	666	0.40625	11823	24.1	312	37.575	51	78.5	66.05	400.843	509.121	318.221	429.428	452.058	1127.05	82.5128	10719.9	107.343	38.0562		9413
	KS940935.7.1.2/2*PASTOR/4/FRAME//MILAN/KAUZ/3/PASTOR	PT	363.75	794.25	0.4525	12445.2	30.225	452.25	28.475	42	73	55.9	400.716	531.027	322.169	408.37	452.734	1100.27	78.5749	11087.4	91.4628	36.1949		9401
	JNRB.5/PIFED/5/BJY/COC//PRL/BOW/3/SARA/THB//VEE/4/PIFED	PT	293	737.25	0.39925	10165.2	29.075	278.25	37.8	54.25	81.5	62.45	397.424	408.451	307.374	430.23	510.606	1064.9	83.9099	10193.4	102.183	38.0214		9406
	JNRB.5/PIFED/5/BJY/COC//PRL/BOW/3/SARA/THB//VEE/4/PIFED	PT	330	741.75	0.44275	12497.2	26.475	292.5	43.475	49.75	80	49.225	396.459	361.588	296.198	497.819	455.382	985.745	83.1492	11430.4	87.9877	34.2856		9403
	SOKOLL/WESTONIA	PT	311.75	755.75	0.409	11622.2	27.35	332.5	34.5	51.25	79.25	65.525	390.706	430.797	314.474	409.575	480.171	1069.6	83.0573	10639.1	108.54	37.0443		9411
	CROC_1/AE.SQUARROSA (224)//OPATA/3/WBLL1	PT	287.75	712	0.40425	9728.25	29.65	288.5	33.675	51	81	63.225	388.315	506.004	288.894	388.306	502.384	975.901	83.8803	9318.04	105.267	41.319		9416
	CROC_1/AE.SQUARROSA (224)//OPATA/3/WBLL1	PT	241.25	646.25	0.3855	7976.75	30.15	244.75	33.275	50.25	79	63.775	381.946	551.916	284.148	356.177	494.483	1036.94	82.4836	9622.48	105.732	39.963		9415
	CROC_1/AE.SQUARROSA (224)//OPATA/3/WBLL1	PT	270	673.75	0.402	8898.25	30.375	255.75	35.275	50.5	78.75	63.9	375.589	421.606	292.68	366.766	501.87	952.903	82.303	9139.76	105.685	40.1134		9417
	CROC_1/AE.SQUARROSA (224)//OPATA/3/WBLL1	PT	292.25	848.5	0.36025	8715.25	33.6	352	28.35	51	79.5	64.8	368.783	523.924	284.848	325.473	464.673	1029.26	83.0145	8323.59	106.122	44.7297		9418
	CROC_1/AE.SQUARROSA (224)//OPATA/3/WBLL1	PT	263.25	668.75	0.394	8803.5	29.9	276.5	32.05	50.5	76.75	72.25	351.176	396.821	270.604	341.489	467.52	951.73	82.6806	8931.71	110.083	40.0644		9414
	Mean all genotypes		331.848	799.586	0.411208	11807	28.5205	341.812	35.4024	51.9554	79.3482	59.7982	406.394	481.185	300.573	447.054	487.798	1064.91	83.3114	10510.8	98.7475	38.1434
	Mean all PT lines		333.42	800.757	0.412613	11769.5	28.75	336.87	35.7757	51.69	79.34	60.23	404.733	476.39	302.117	435.82	486.619	1063.46	82.8534	10473.4	99.4052	38.5347
	Mean all checks		318.75	789.833	0.3995	12119	26.6083	383	32.2917	54.1667	79.4167	56.2	420.232	517.885	288.979	474.278	498.407	1079.54	82.9702	11026.6	95.2355	37.2681
	Mean all PT:mean all checks		1.04602	1.01383	1.03282	0.971162	1.08049	0.879556	1.10789	0.954277	0.999035	1.07171	0.963119	0.919875	1.04546	0.918913	0.976347	0.985097	0.998593	0.949827	1.04378	1.03399
	P value: mean all PT v mean all checks		0.771	0.912									0.4477	0.4502	0.5643	0.2292	0.7793	0.7713	0.9579	0.2579	<0.01	0.1633
	P value Top PT line v local check		0.214	0.187									0.315	0.381	<0.01	0.763	0.397	0.433	<0.01	0.0105	<0.01	<0.01
	P value: Top 3 PT lines v Top 3 checks		0.129	0.183									0.5968	0.4302	0.1226	0.67	0.4501	0.376	0.3291	0.3657	<0.01	<0.01
	SE mean		59.22	130.53	0.016164	2309.6	1.10339	14.2649	10.7298	1.49192	1.66704	6.31524	23.421	66.5093	26.4906	38.5076	56.126	60.9303	2.768	574.772	1.4762	1.04508
	Coefficient of variation		0.3	0.272	0.0703019	0.327185	0.0706866	0.579302	0.52206	0.0475071	0.0384544	0.203715	0.443934	0.382819	0.41436	0.355653	0.399774	0.321294	0.254151	0.380602	0.114476	0.189357
	Alpha lattice adjusted means. Abbreviations: yield (YLD), biomass (BM), harvest index (HI), kernel number per m2 (KNO), thousand kernel weight (TKW; g), spike density (Spikes), grains per spike (Grains/spike), days to heading (DH), days to anthesis (ANT), and plant height (HGT). For all target environments (All) or individual clusters (C#). Physiological Trait selected lines (PT) or checks: local…
